# Supplementary material for: Dialysis, Distress, and Difficult Conversations: Living with a Kidney Transplant
Source: MDPI journal article supplement (doi:10.3390/healthcare10071177), 2022-06-23
Supplement: s1 [file s1]

**Table S1.** Semi-structured interview schedule example.

| Topic           | Example questions                                                                                                                                                   |
|-----------------|---------------------------------------------------------------------------------------------------------------------------------------------------------------------|
| Open invitation | Tell me a little about your treatment journey?                                                                                                                      |
| Emotional       | Can you tell me what feelings you experience day to day living with a kidney transplant?                                                                            |
| Social          | Can you describe to me how you feel your social life has changed since your transplant?                                                                             |
| Physical        | What has been the impact on your body?                                                                                                                              |
| Financial       | Can you tell me about the financial practicalities you experience living with a kidney transplant?                                                                  |
| Support         | Can you describe to me what coping skills you have used?                                                                                                            |
| COVID-19        | Can you describe any specific concerns at the beginning of the coronavirus outbreak?<br>Have your concerns changed since the beginning of the coronavirus outbreak? |
